# Supplementary material for: Identification and biological characterization of pathogen causing sooty blotch of Ardisia crispa (Thunb.) A.DC
Source: PeerJ. 2025 Mar 24;13:e19130. doi: 10.7717/peerj.19130 (PMC11949116; doi:10.7717/peerj.19130)
Supplement: Supplemental Information 6 [file peerj-13-19130-s006.xlsx]

## Sheet: Table S1
Table S1 DDRT-PCR 3' end-anchored primer sequence for analysis of differences in gene expression between healthy and diseased Ardisia crispa (Thunb.) A.DC. Leaves
Anchor primer(AP)	Base sequence
B0327	AAGCTTTTTTTTTTG
B0328	AAGCTTTTTTTTTTA
B0329	AAGCTTTTTTTTTTC

## Sheet: Table S2
Table S2 DDRT-PCR 5' terminal random primer sequence for analysis of gene expression differences between healthy and diseased Ardisia crispa (Thunb.) A.DC. Leaves
Random primer (RP)	Base sequence
B0301	TACAACGAGG
B0302	TGGATTGGTC
B0303	CTTTCTACCC
B0304	TTTTGGCTCC
B0305	GGAACCAATC
B0306	AAACTCCGTC
B0307	TCGATACAGG
B0308	TGGTAAAGGG
B0309	TCGGTCATAG
B0310	GGTACATTGG
B0311	TACCTAAGCG
B0312	CTGCTTGATG
B0313	GTTTTCGCAG
B0314	GATCAAGTCC
B0315	GATCCAGTAC
B0316	GATCACGTAC
B0317	GATCTGACAC
B0318	GATCTCAGAC
B0319	GATCATAGCC
B0320	GATCAATCGC
B0321	GATCTAACCG
B0322	GATCGCATTG
B0323	GATCTGACTG
B0324	GATCATGGTC
B0325	GATCATAGCG
B0326	GATCTAAGGC

## Sheet: Table S3
Table S3 ITS primer sequence was used to analyze AC Pathogenic fungi
Primer names	Forward and backward	Primer sequence
ITS1/ITS4	ITS1	TCCGTAGGTGAACCTGCGG
	ITS4	TCCTCCGCTTATTGATATGC

## Sheet: Table S4
Table S4 The results of DDRT-PCR sequence.
base sequence	gene
CTCCCCTGCGTGTACGCGTGACCCTGTCTACCTCTCCGGATCTCTGTTAAATTATACAATTGGGTATCAGATGCCCACATTCCAAAAAAGATGTCCTGATAAGGTATTGAATAGGAATTCGTGGATCATTGATCTATGAAAAGGATAGCTGTTTGTCTGTTAATCTGCTATCCGCTAGTTGGTCCTTCCTGCGACACTAACCCTTCGATGTCCAGCTACTCTATAGCAAAATGGGGTAGACATCACGGGTTAGTCTACCCACCTCTTGCTTTTACTAACCTTTGTGCAGTACGTACCGGCTCCATGGATGAAGAAATATCAATAAACACATAACCACAGAAACATCAATCATTCTCATCTACTCCTGCTATCTGAATGCCCATGTTTTGCCTTTTCTTT…	1.Pahang malaccensis strain Doubled-haploid Pahang
CGGTCCCGCCTGAGTCGGACGCGTATAGAGCACAGACGAGTGACAGGTGTAGCGGAGCTGCGTGAGATTTTTTCATTCATAATTGGGAAAAAACCCCCTTTTGATGAATTTTTGAATTGAGCTTATTGACAAAATGTTGACTTTTTGATAATTTTGTAACTAAATGAAACCCTAACGATAAAAATGTAAACCTTAAAGTTACATTTAGTTACAAGTTGAACAAAAGATTTAACATTTGGAATGGATAGATTGATTTCAAATAATCTCCATTTGGCGATAACTTACTAATAATGCATACAAAAAACATCAACACACAAGTCCTTTCCACATCTAAAACACTTCTGGAGCTTCTCCTCACCACGCAGCTGAAATGTGTGCTACCAAAAAAAAAACTTTATC	2.736zinc finger protein 736
	3.727 zinc finger protein 727
	4.sodium-independent sulfate anion transporter-like
CGGTACTAGAGCTCAACTAGGATAGAGACAGAAGCCTTACTGAGTTGCGAGCTGCCTGAATATTTTTTCATCCCTTATTGGGAAAAATATCCCCCTATGGATGAACTTCTGATTTGAGCTTGCCAAACCAAATGTTAAACTTTGCGATAATTACGAAACTTAATGTAACTCGAAGGATAACATTGTAATCCTTAAGGTTACATTAAGTTTAGAGATGAAAGAAAAATTTAAGATTTGGAATGTATTGATTGAATTCAAATGATCATACAAATGGAGATAACTTACCCATTTAGGGCTGAAAATTTTTCGGAGAGCACCTTTCCATCAGTAAAACACTCCTGGTGCTTCTCCACACCACGCAGCTGAATTGTGTGCTATTAAAAAAAAAACTTTA	5.OCRL,inositolpolyphosphate-5-phosphatase
	6.inositolpolyphosphate-5-phosphatase
TCCCGGTACGCGTGTAGAGCACAGAACGTCTGACATGAGTAGCGGTGCCGCGTGAATATTTAAATCATCCCTAATTGGGAAAAAATCACCCTTTGGGATAACTTCTGATTTCAATCTATAAATTACAATCTTAACTTTTCGATCATCTCGAAACTTAATGTAACTCGTTAGATAAAAATGTAAACCTTAAAGTTACATTAAGTTACATGATGAAAAAAAAATTGAACATTTGGAATGTATAGATTGAAATCAAATAATCTCCATTTGGTTATATTTTACCCATAATGCATATGATTTATATTTACACAGAAGTCCTTTCCATCTGAAAACACTTCTGGTGCTTCTATTTTCCACCCAGCTGAATTGTTTACTACCAAAAAAAAAAAACCTT	7.katanin regulatory subunit B1 like 1
TGTGTCCTGTCGCGTGTAGAGCACCAGAACGACTGACAGATGTTGCACTGCTGCCTGAATAATTAAATCATCCCTTATTGGGAAAAAATACCCTAAGGGATAACTTCTGATTTGAGCTATAAATTACAATGTTAACTTTTCGATCAACTCGAAACTAAATGAAACCCTAAGGATAAAAATGTAAACCTTAAAGTTACATTAAGTTACATGATGAACACTAAATTTAACATTTGGATTGTATTGATCGATTTCAAAAAATCTCCATTTGGTTATAACTTACCCATAATGCATAGAAAAATATTTACACACAAGTCCTTTCCATCTGAAAACACTCTTGGTGTTTCTCCTTTCCACCCAGCTGAATTGTGTGCTGCCAAAAAAAAAACTTT	8.carboxylesterase 3
GGATAGGTAGCGAGTAGAGCACCAGAACTACTGACATAAGTAAAGGAGCTGCCTGAATATTTTTTCATGCCTTATTGGGAAAAATATACCCTAAGGATGAACTTTTGATTTGTGCTAGCCAACCAAATGTTAACTTTGCGATCATTTTGAAACTTAATGAAACCTTAAGGATAAAATTGTAAACCAACGAGTTACATTAAGTTACATGATGAACACTTGATTGAACATTTGGATTGGATTGATTGAAATCAAAAAATCATACAAATGGTTATAACTTACCCATTTAGCATATGATTTATTTTTACACAGTAGTCCTTTCCATCTGTCAACACTTCTGGTGTTTCTCTTTAACACCCAGCTGAATTGTGTGCTGTTAAAAAAAAAAACTTT	9.acyl-coenzyme A thioesterase 2, chloroplastic
CCGTTGCGGGCCGCGATTTAGATAACAAGAAGTACTGACAGAAGTTAAAGTGCTGCCTGAATAAATAAATCATGCATTAATGGGTAAAATATAAAACTAATGGATAACATCTGATTTCAATCTATAAATTAAAATCTTAACTTTTCGTTCAATTTGAAACTAAATGTAACTCGTTAGATAAAAATGTAAACCTTAAGGTTTTATTAAGTTTAGAAATGATAGAAAAATTGAACATTTGGTTTGTATTGCTCGATTTTAAAAAATCTCCAAATGGTGATAACTTACTAATAATGCATATAAAAAATTTTTCGGTGTAGTCCTTTCCTCATGTAAAACACTCTTGGTTTTTCTCCACACCACCCAGGACAATTGTTTACTGTAAAAAAAAAAACTTTA	10.peptidyl-prolyl cis-trans isomerase E
	11.DNA-binding transcriptional regulator BolA-like
CCTGGTATTTAATTTTTATCGCCATCGCCGATTCGCTGTCTCTCTCTCTCCTCTCCCTCTCTCCCTCTCTCCCCCATTCTATCTGTATAACCCTAATCTCTCTCAATCTTTTTTTTTTTTTTGGAATTTAATCCCCCTCCCTCTCTCTCTGGGGGTAAAAAAAAGTCAGATCATTCAATTTTAGTTACAAAAAAGAAGGGGCCCGTTAAGGGTACGCCGCATTGCTGTTCTTTTGGTAATTATTGCCCCTGGATAAGCGCCCAACAAAACCACAACATCTTCGACCAAAGCGTGAAATTTCCCGGTGTAACACCGCGCGGACTAGGACTTCACGGCTGGTGGCTCTAATGGC	12.RNA methyltransferaseAt5g51130
	13.LRR receptor-like serine/threonine-protein kinase At1g06840
	14.26S protease regulatorysubunit 8 homolog A-like
	15.MDS1 and EVI1 complex locusprovided
	16.tRNA methyltransferase 9B
	17.SUB1 regulator of transcription
GGCCCGGGCGTCTATGTAGAACACAAGAACGTCTGACATAAGTAAAGGACTACGCCGAAATATTTAAATCATGCATAATTGGGAAAAAATCAACCTTTGGATGAATTTTTGAATTGTTCAATAAAAACCAAATGTTAACTTTTCGATAATTTCGAAACTTAATAAAACCTTAAGGTTAACATTGTAAACCAACGAGTTACATTAAGTTACATGTTGAACACTTAATTGAACATTTGTAATGTATAGATTGATTTCAAATGTAATCCATTTGGTTATATTTTACTAATTTAGGGCTGATTTATTTTTCGCACAGCACTTTCCATCTGTCAACACTTCTGGTGCTTCTATTTTACACGCAGCTGAATTGTGTGCTGTAAAAAAAAAAACTTTACA	18.UDP-N-acetylglucosamine pyrophosphorylase
	19.bone morphogenetic proteinreceptor type-2
TGGTCCAGTTTCTCGAGTAGAGCACAGAAGTACTGACATGTGTAGCAGTGCTGCCTGAATATTTTTTCATGCCTTATTGGGAAAAATATCACCCTATGGGATAACTTCTGATTTCAAGCTAGCCAACCAAATGTTAACTTTTCGATCATTTTGAAACTAAATGAAACTCTAAGGATAAAATTGTAAACCTTAAAGTTACATTAAGTTAAATGATGAAAGAAAGATTTAACATTTGGATTGTATTGATTGATTTTAAATGATCATAATTTGGTTATATTTTACTAATAAAGCATATAATTTATTTTTCGGAGTACACCTTTCCATCTGTAAAACACTTTTGTTTTTTCTCCACACCACCGAGCTGAATTGTTTACTATAAAAAAAAAAAACTTT	20.NIMA related kinase 2
GCGTCGGTAGGCGTGTAGAGCACAGAACGACTGACTGTGTAGGCAGCTGCCGGAATATTTTTTCATGCCTTAATGGTAAATCATCACCCTTGGGATAATTTTTGATTTGATCAATAAAAACCTAATGTTAACTTTTCGATCATTTTGAAACTAAATAAAACCTTAAGGATAACATTGTAATCCTTAAAGTTACATTTAGTTACATGATGATAGATTGATTGTACATTTGGAATGTATAGATTGATTTCAAATGCACTCCATTACGGTTATATCTTACCCATAATGCATAGATTTATATTTACACAGTGCACCTTTCCATCTGTAAAACACTTCTGGTGTTTCTCCACTCCACCGTGCTGAATTGTGTACTATCAAAAAAAAAAACCTAATGGACAAGTC…	21.receptor-like protein 4
GAGGATGGATCCATACTGTTTTGTTCGGATTTAATAATTGTGGATCTCCTCCTGGATTGGTTTTTTGAATTTTACTTACCAATTAATGGGAATGGAAAATGGTTTTGGTTTCCCCCTCCCCAAATGGTTCCTGGGGCCGAAAACAAA	22.nucleoporin 54provided
TGGCTACTTCACCTAGTAGAGCACCTGATGGACTGACTGAGTAGCACAGCTGCGTGAATATTTTTTCATCCCTTATTGGGAAAAAATCCCCCTTATGATGAACTTTTGATTTGATCTATAAATTACAATGTTACCTTTTCGATCAACTCGAAACTTAATGAAACTCTAAGGATAAAATTGTAAACCTTAAAGTTTTATTAAGTTACATGATGAAAAAATAATTGAACATTTGGATTGTATTGATCGATTTCAAATGATCATACAAATGGTTATAACTTACCCATAATGCATATGAAATATTTTTCCACAGAACACCTTTCCATCTGTAAAACACTCTTGGTTTTTCTCCACAACACCGAGCTGAATTGTGTGCTATTAAAAAAAAAAACTTT	23.nuclear pore membrane glycoprotein 210
	24.TANK binding kinase 1
GTCGGTCCATGGAAGCGAAATAGAGACAGAACGACTGACATGAGTAGCGGACTACGCCGGAATATTTTTTACATGCCTTATTGGGAAAAAATCACCCTATGGATGATTTTCTGATTTGATGAATAAATTAAAATGTTAACTTTTCGATCATTTCGAAACTTAATGAAACCTTAAGGATAACATTGTAAACCTTAAAGTTACATTAAGTTACATGATGAACACTTAATTGAACATTTGGAATGTATAGCTCGAAATCAAATGTAATCCATTATGGTTATATTTTACCCATAAAGGGCTGATTTATTACTACACACAACACCTTTCCATCTGTAAAACACTTCTGGTGCTTCTATTTTCCACCCAGCTGAATTGTGTGCTATCAAAAAAAAAAAACCTT	25.centrosomal protein 192
	26.PVR cell adhesion molecule related 2 like
CGATGGGGTGATCCACAAGTAGTTATTAGGAAGAGCTCAGTTCCTGCTCCCGGATCGAATCAATTGGCTCCGATGGGCAGCATGTCCGTTTTGGGACTGATTGGCTTGAAGGACACCTTCTCGGGGAGAACTAACTAACCAATTCGTCTTCCTGACCACCCTTTGACCTCTTCCCAGCCTGTTGGCTGAAGTCGAGGAGTCTTGACTCTAGGATTTTGAAGAACTTGACTAGCGTGTCCTTGTTCCAATCTTCGCTGGGATTGTGTCCTCCTGCTGTGGCTTCCTCCACTGATGTGGGCAGTGCGAACAGCTTTCTCAGATGATTTCAGACTTCCATGGTCGAGCACCGAGTAATGGAATGCCAGTCCAACCCTAGGGAAAGGGGTTGGAGTTTCATTC…	27.14-3-3-like protein B
	28.14-3-3-like protein GF14 phi
	29.GF14 protein phi chain
	30.general regulatory factor 2
CGATCAATCGCGAGTAGAGCACAGAACTACTGACATAAGTAGCGAGCTGCCTGAATATTTTTTCATGCCTTATTGGGAAGATATCCCCCTAAGGATGAACTTCTGAATTGAGCTAGCCAACCAAATCTTAACTTATCGATCATTTCGAAACTTAATGAAACCTTAAGGATAACATTGTAATCCAACGAGTTACATTAAGTTAAAAGATGAAAGAATGATTGAACATTTGGATTGGATTGATTGATTTCAAATGATCTCCATTTGGTTATATTTTACCCATAATGGGCTGATTTATTTTTCGCAGAACACCTTTCCATCTGTCAACACTTTTGGTTTTTCTCTTTAACTCCGAGCTGAATTGTGTGCTATTAAAAAAAAAAAACTTT	31.trans-Golgi network integral membrane protein TGN38-like
GGATGTTTTTCCTGCCCGTCCACGATTATCTGACGGGCGGATGTGCTTCTTCCCACGGATGTTGGACCTTGTAGTACCCCTGGAGGGGGGTGGATCTACCGTGTCCTATAATGCGGTGGTGTTCCCTATTTGAGGAAGAAAGCACAAAGAGGATCTTACTAAGGAAAATTTCAAGAACCTGATTCATTGTCTGAGAAAATCACCTTGAGCGTGTTGAAAATAAGACCAAGGAAGGGGACAAGACGGAATGTTTGAGATGTTCAACCCTCGGACCCTGATTTGGGGTGTTACGTTCCTAAGGAAGGTAATATATCCCGGATCTGAAATGCTCCACTCAATCGATTCTTAGTTTATCTAAAATCATGTTTTCTATTTCGTACATGTAACGGTTAATTCCCT…	32.oxygen-evolving enhancer protein 1, Chloroplastic
	33.oxygen-evolving enhancer protein 1-2, chloroplastic

## Sheet: Table S5
Table S5 DDRT-PCR related gene statistics
Genes	number(69 in total)
Pahang malaccensis strain Doubled-haploid Pahang	1
736zinc finger protein 736	1
727 zinc finger protein 727	1
sodium-independent sulfate anion transporter-like	5
OCRL, inositolpolyphosphate-5-phosphatase	1
inositolpolyphosphate-5-phosphatase	2
katanin regulatory subunit B1 like 1	1
carboxylesterase 3	1
acyl-coenzyme A thioesterase 2, chloroplastic	2
peptidyl-prolyl cis-trans isomerase E	1
DNA-binding transcriptional regulator BolA-like	1
RNA methyltransferaseAt5g51130	2
LRR receptor-like serine/threonine-protein kinase At1g06840	2
26S protease regulatorysubunit 8 homolog A-like	1
MDS1 and EVI1 complex locusprovided	1
tRNA methyltransferase 9B	1
SUB1 regulator of transcription	1
UDP-N-acetylglucosamine pyrophosphorylase	1
bone morphogenetic proteinreceptor type-2	1
NIMA related kinase 2	1
receptor-like protein 4	2
nucleoporin 54provided	1
nuclear pore membrane glycoprotein 210	1
TANK binding kinase 1	7
centrosomal protein 192	4
PVR cell adhesion molecule related 2 like	2
14-3-3-like protein B	1
14-3-3-like protein GF14 phi	1
GF14 protein phi chain	1
general regulatory factor 2	1
trans-Golgi network integral membrane protein TGN38-like	2
oxygen-evolving enhancer protein 1, Chloroplastic	4
oxygen-evolving enhancer protein 1-2, chloroplastic	1
uncharacterized	12

## Sheet: Table S6
Table S6 The 11 pathogenic fungi strains.
strain	base sequence
>AC1	CCCTTTGTGACCTACCTATGTTTCCTCCGGCGTACCGCTTTAGCCTACCCACAGGGCTCCCCCAAGGGGGGGGTTCTGCTGGGGAGGTGCCTGAGTGCTACCTATCCTTCGGGGTACGGTTAGTGCAGTGAAGGTGCCGACCAAGGCCTCGGCGGCGCCGAGTAGGACCGCTCCAAACTTAAGCACCTAGTGCATCCAACCCCGCGTTGAACAACTATCGAAAATTTGCTTTTGCATTTGCTCTATTGCATTTTTTCTTTACGCTAGAACGTCTTTCCCGGTTGGAATTATTGCTCGAGATGCCCTAAAAGACTGATCGTAAGCACTGTAGGATGCGTGAAATGTGTGAAATGTCCCTCTCGTAGTGTCCTTTCCACATCGCTCAAACGTGTTTCCCGG…
>AC2	CGTAGGGGAACCTGCGGAGGGATCATTACACAAATATGAAGGCGGGCTGGACCTCTCGGGGTTACAGCCTTGCTGAATTATTCACCCTTGTCTTTTGCGTACTTCTTGTTTCCTTGGTGGGTTCGCCCACCACTAGGACAAACATAAACCTTTTGTAATTGCAATCAGCGTCAGTAACAAATTAATAATTACAACTTTCAACAACGGATCTCTTGGTTCTGGCATCGATGAAGAACGCAGCGAAATGCGATAAGTAGTGTGAATTGCAGAATTCAGTGAATCATCGAATCTTTGAACGCACATTGCGCCCTTTGGTATTCCAAAGGGCATGCCTGTTCGAGCGTCATTTGTACCCTCAAGCTTTGCTTGGTGTTGGGCGTCTTGTCTCTAGCTTTGCTG…
>AC3	TCCGTAGGTGAACCTGCGGAGGGATCATTAAAGAGTTATTACAACTCCCAAACCCATGTGAACTTACCTTCTGTTGCCTCGGCAGGTCGCGACCTACCCTGTGAGACCCTACCCTGTAGGGTCCTACCCGGTAGTCGCGGGTATGCCTGCCGGTGGCCCATGAAACTCTGTTTATTACTGTTATTCTGAATCTATAACTAAATAAGTTAAAACTTTCAACAACGGATCTCTTGGTTCTGGCATCGATGAAGAACGCAGCGAAATGCGATAAGTAATGTGAATTGCAGAATTCAGTGAATCATCGAATCTTTGAACGCACATTGCGCCCATTAGTATTCTAGTGGGCATGCCTGTTCGAGCGTCATTTCAACCCTTAAGCCCCTGTTGCTTAGCGTTGGG…
>AC4	TTCCGTAGGTGAACCTGCGGAGGGATCATTAAAGAGTGTAATAACTCCAAACCCATGTGAACATACCTCATGTTGCCTCGGCAGGTCGCACTTTTCTCGTAGGTCCTACCCTGTAGGCCCTACCCGGAAGGCGCGGGTACCCCTGCCGGCGGCCCACGAAACTCTGTCTCATAGTTGAATTCTGAACCTATAACTAAATAAGTTAAAACTTTCAACAACGGATCTCTTGGTTCTGGCATCGATGAAGAACGCAGCGAAATGCGATAAGTAATGTGAATTGCAGAATTCAGTGAATCATCGAATCTTTGAACGCACATTGCGCCCATTAGTATTCTAGTGGGCATGCCTGTTCGAGCGTCATTTCAACCCTTAAGCCCCTGTTGCTTAGCGTTGGGAGCC…
>AC5	TTCCGTAGGTGAACCTGCGGAGGGATCATTAAAGAGTTAAAACAACTCCTAAACCCATGTGAACCTACCATTGTTGCCTCGGCAGGTCTGCAACTTACCCTGAGGGTCCCTACCCTGTAGGGACCTTACCCGGTAGTTGCGGGCATAACCTGCCGGTGGTCTACTAAACTCTGTTTACTATGTTATTCTGAATAATATAACTAAATAAGTTAAAACTTTCAACAACGGATCTCTTGGTTCTGGCATCGATGAAGAACGCAGCGAAATGCGATAAGTAATGTGAATTGCAGAATTCAGTGAATCATCGAATCTTTGAACGCACATTGCGCCCATTAGTATTCTAGTGGGCATGCCTGTTCGAGCGTCATTTCAACCCTTAAGCCCTGTTGCTTAGCGTTG…
>AC6	CCGTAGGTGAACCTGCGGAGGGATCATTACAAGTGACCCCGGTCTACCACCGGGATGTTCATAACCCTTTGTTGTCCGACTCTGTTGCCTCCGGGGCGACCCTGCCTTCGGGCGGGGGCTCCGGGTGGACACTTCAAACTCTTGCGTAACTTTGCAGTCTGAGTAAACTTAATTAATAAATTAAAACTTTTAACAACGGATCTCTTGGTTCTGGCATCGATGAAGAACGCAGCGAAATGCGATAAGTAATGTGAATTGCAGAATTCAGTGAATCATCGAATCTTTGAACGCACATTGCGCCCCCTGGTATTCCGGGGGGCATGCCTGTTCGAGCGTCATTTCACCACTCAAGCCTCGCTTGGTATTGGGCAACGCGGTCCGCCGCGTGCCTCAAATCGA…
>AC7	CGTAGGGGAACCTGCGGAGGGATCATTACAGAGTTATCCAACTCCCAAACCCATGTGACTTATCTCTTTGTTGCCTCGGCGCAAGCTACCCGGGACCTCGCGCCCCGGGGGGCCCGCCGGCGGACAAACCAAACTCTGTTATCTTCGTTGATTATCTGAGTGTCTTATTTAATAAGTCAAAACTTTCAACAACGGATCTCTTGGTTCTGGCATCGATGAAGAACGCAGCGAAATGCGATAAGTAATGTGAATTGCAGAATTCAGTGAATCATCGAATCTTTGAACGCACATTGCGCCCATTAGTATTCTAGTGGGCATGCCTGTTCGAGCGTCATTTCAACCCCTAAGCACAGCTTATTGTTGGGACTCTACGGCTTCGTAGTTCCCCAAAGACATTGG…
> AC8	GATATGCTTAAGTTCAGCGGGTATCCCTACCTGATCCGAGGTCAACCTTAGAAATGGGGTTGTTTCACGGCGTGGCCTCCCGCGGCACCCTTTAGCGAATAGTTTCCACAACGCTGAGGGGACGAAAGACCCAGCCGGTCGATTTGAGGCGCGCGGCGGACCGCGTCGCCCAATACCAAGCGAGGCTTGAGTGGTGAAATGACGCTCGGACAGGCATGCCCCCCGGAATACCAGGGGGCGCAATGTGCGTTCAAAGATTCGATGATTCACTGAATTCTGCAATTCACATTACTTATCGCATTTCGCTGCGTTCTTCATCGATGCCAGAACCAAGAGATCCGTTGTTGAAAGTTTTAATTTATTAATTAAATTTACTCAGACTGCAAAGTTACGCAAGAG…
> AC9	ATATGCTTAAGTTCAGCGGGTATCCCTACCTGATCCGAGGTCAACCTTAGAAATGGGGTTGTTTTACGGCGTGGCCTCCCGCGGCACCCTTTAGCGAATAGTTTCCACAACGCTGAGGGGACGAAAGACCCAGCCGGTCGATTTGAGGCGCGCGGCGGACCGCGTCGCCCAATACCAAGCGAGGCTTGAGTGGTGAAATGACGCTCGAACAGGCATGCCCCCCGGAATACCAGGGGGCGCAATGTGCGTTCAAAGATTCGATGATTCACTGAATTCTGCAATTCACATTACTTATCGCATTTCGCTGCGTTCTTCATCGATGCCAGAACCAAGAGATCCGTTGTTGAAAGTTTTAATTTATTAATTAAATTTACTCAGACTGCAAAGTTACGCAAGAGT…
>AC10	TCCGAGGTCACCACTATAATTTATAGGGGGTTTTTACGGCAAGCAGCTACAGCCTCCCTGAAAGCGAGTTAAACTACTACGCTTAGAGTGTGCTATAACTCCGCCACTGAATTTAAGGAACTACCCCTCAGGTGAGGGGTAGATTCCCAACGCTAAGCTACAAGGCTTAAGGGTTGTAATGACGCTCGAATAGGCATGCCCACTAGAATACTAATGGGCGCAATGTGCGTTCAAAGATTCGATGATTCACTGAATTCTGCAATTCACATTACTTATCGCATTTCGCTGCGTTCTTCATCGATGCCAGAACCAAGAGATCCGTTGTTGAAAGTTTTAACGTATTTGGTTTTTAAAACCTTGGTTTGATCACCCCCTAAAACCGTAGTTTATAGGTGGCTT…
>AC11	GATATGCTTAAGTTCAGCGGGTATTCCTACCTGATCCGAGGTCAAATTTTCAGAAGTTGGGGGTTTAACGGCAGGGCACCGCCAGGGCCTTCCAGAGCGAGATGTAACTACTACGCTCGGGGTCCTGGCGAGCTCGCCACTAGATTTCAGGGCCTGCCCTTTCACAGGCAGTGCCCCATCACCAAGCCAGGCTTGAGGGTTGAAATGACGCTCGAACAGGCATGCCCTCCGGAATACCAGAGGGCGCAATGTGCGTTCAAAGATTCGATGATTCACTGAATTCTGCAATTCACATTACTTATCGCATTTCGCTGCGTTCTTCATCGATGCCAGAACCAAGAGATCCGTTGTTGAAAGTTTTGATTCATTTATGTTTTTTACTCAGAGATTCACTATAGA…

## Sheet: Table S7
Table S7 Classification of blast results of fungi.
Name	Genus	Species	Homology ratio(%)
AC1	Annulohypoxylon	Annulohypoxylon stygium	99.68
AC2	Alternaria	Alternaria tenuissima	99.82
AC3	Xylaria	Xylaria grammica	99.43
AC4	Nemania	Nemania diffusa	99.3
AC5	Xylaria	Xylaria arbuscula	99.82
AC6	Cladosporium	Cladosporium cladosporioides	99.63
AC7	Nigrospora	Nigrospora oryzae	99.82
AC8	Cladosporium	Cladosporium halotolerans	100
AC9	Cladosporium	Cladosporium endophyticum	100
AC10	Annulohypoxylon	Annulohypoxylon stygium	99.68
AC11	Diaporthe	Diaporthe angelicae	98.72

## Sheet: Table S8
Table S8 Average colony diameter of AC10 at different pH
PH	colony diameter-1 (cm)	colony diameter-2 (cm)	colony diameter-3 (cm)	colony diameter (cm)
pH5	8.05	8.15	7.88	8.0266±0.1365
pH6	7.885	8	6.2	7.3616±1.0076
pH7	8.355	8.145	8.22	8.24±0.1064
pH8	8.12	8.35	8.265	8.245±0.1162
pH9	7.875	8.4	8.315	8.1966±0.2817
pH10	7.85	8.3	8.09	8.08±0.2251
pH11	8.085	8.235	8.13	8.15±0.0769
pH12	8.115	8.4	8.195	8.2366±0.1469

## Sheet: Table S9
Table S9 Average colony diameter of AC11 at different pH
PH	colony diameter-1 (cm)	colony diameter-2 (cm)	colony diameter-3 (cm)	colony diameter (cm)
pH5	8.135	7.855	8.405	8.1316±0.2750
pH6	8.6	8.6	8.6	8.6000±0
pH7	8.6	8.6	8.6	8.6000±0
pH8	8.6	8.6	8.6	8.6000±0
pH9	8.6	8.6	8.6	8.6000±0
pH10	8.6	8.6	8.6	8.6000±0
pH11	8.6	8.6	8.6	8.6000±0
pH12	8.6	8.6	8.6	8.6000±0

## Sheet: Table S10
Table S10 colony diameter of AC10 under different light conditions
photoperiod	colony diameter-1 (cm)	colony diameter-2 (cm)	colony diameter-3 (cm)	colony diameter (cm)
24h full-light	6.8	6.53	6.435	6.5883±0.1893
24h full-darkness	5.22	5.42	5.385	5.3416±0.1068
12hlight/12hdarkness	5.4	5.54	5.52	5.4866±0.0757

[truncated: 3 more sheets: Table S11, Table S12, Table S13]
